# Supplementary material for: A Bibliometric Analysis of the Impacts of Air Pollution on Children
Source: PubMed Central journal article supplement (PMC7068507; doi:10.3390/ijerph17041277), 2020-02-17
Supplement: ijerph-17-01277-s001.pdf [file ijerph-17-01277-s001.pdf]

## Supplemental material

### A Bibliometric Analysis of the Impacts of Air Pollution on Children

**Table S1** Literature retrieval strategy in the PubMed.

**Table S2** Literature retrieval strategy in the Web of Science.

**Table S1** Literature retrieval strategy in the PubMed.

Retrieved on 23 June 2019

| Search | Query                                                                                                                                                                                                                                                                                                  | results |
|--------|--------------------------------------------------------------------------------------------------------------------------------------------------------------------------------------------------------------------------------------------------------------------------------------------------------|---------|
| #1     | Search "Air Pollution"[Mesh] OR "Air Pollutants"[Mesh] OR "Particulate Matter"[Mesh] OR "Nitrogen Dioxide"[Mesh] OR "Sulfur Dioxide"[Mesh] OR "Ozone"[Mesh] OR "Vehicle Emissions"[Mesh] OR "Carbon monoxide"[Mesh]                                                                                    | 156395  |
| #2     | Search "ambient air pollution"[Text Word] OR PM2.5[Text Word] OR PM10[Text Word] OR SO2[Text Word] OR O3[Text Word] OR "Carbon monoxide"[Text Word] OR "air quality"[Text Word] OR "Atmospheric pollution"[Text Word] OR "inhalable particles"[Text Word] OR "Inhalable particulate matter"[Text Word] | 68304   |
| #3     | Search "Infant"[Mesh] OR "Child"[Mesh] OR "Adolescent"[Mesh] OR "Pediatrics"[Mesh]                                                                                                                                                                                                                     | 3435112 |
| #4     | Search (#1 OR #2) AND #3 AND ("1999"[Date - Publication] : "2018"[Date - Publication])) AND English[Language]                                                                                                                                                                                          | 12156   |

12156 PMID were extracted from search results

**Table S2** Literature retrieval strategy in the Web of Science.

| search | Query                                                                                                                                                                                                                                                                                                                                                                                                             | results |
|--------|-------------------------------------------------------------------------------------------------------------------------------------------------------------------------------------------------------------------------------------------------------------------------------------------------------------------------------------------------------------------------------------------------------------------|---------|
| #1     | PMID=(31126003 OR 30766556 OR 30759582 OR 30682747 OR 30677904 OR 30677897 OR .....)                                                                                                                                                                                                                                                                                                                              | 11051   |
| #2     | (TS=(Air Pollution OR Air Pollutants OR Particulate Matter OR Nitrogen Dioxide OR Sulfur Dioxide OR Ozone OR Vehicle Emissions OR Carbon monoxide) OR TS=(ambient air pollution OR PM2.5 OR PM10 OR SO2 OR O3 OR Carbon monoxide OR air quality OR Atmospheric pollution OR inhalable particles OR Inhalable particulate matter)) AND language: (English)<br><i>Indexes=SCI-EXPANDED, SSCI Timespan=1999-2018</i> | 286,945 |
| #3     | (#2 AND TS=(Infant OR Child OR Adolescent OR Pediatrics)) AND language: (English)<br><i>Indexes=SCI-EXPANDED, SSCI Timespan=1999-2018</i>                                                                                                                                                                                                                                                                         | 9,503   |
| #4     | (#3 OR #1) AND language: (English) AND DOCUMENT TYPES: (Article OR Letter OR Review)<br><i>Indexes=SCI-EXPANDED, SSCI Timespan=1999-2018</i>                                                                                                                                                                                                                                                                      | 15,999  |
